# Supplementary material for: Transgenerational Effects of Resistance Exercise During Pregnancy: Skeletal Muscle Fiber Hypertrophy in F1 Offspring
Source: Research Square preprint supplement (doi:10.21203/rs.3.rs-7156754/v1), 2025-08-26
Supplement: Supplementary file 1 [file 5f5df9641715ca6e0b8f4dac.docx]

**List of Tables**

**Table 1: Experimental Groups and Sample Sizes**

| Group | Description | F0 Mothers (n) | F1 Offspring Analyzed (n) | Age at Analysis |
| --- | --- | --- | --- | --- |
| SED | Sedentary control | 6 | 3 (females) | 12 weeks |
| EXER | Resistance exercise | 4 | 7 (females) | 12 weeks |

**Table 2: Exercise Protocol Details**

| Parameter | Specification |
| --- | --- |
| Exercise Type | Vertical ladder climbing |
| Ladder Dimensions | 1 m high, 18 cm wide, 80° inclination |
| Training Frequency | 3 times per week |
| Training Period | GD7 to GD19 (approximately 2 weeks) |
| Initial Load | 50% body weight |
| Progressive Loading | 75%, 90%, 100% body weight |
| Session Duration | 30 minutes |
| Rest Intervals | 1 minute every 10 minutes |
| Familiarization | 1 week without load |

**Table 3: Statistical Analysis Methods**

| Analysis | Test Used | Assumptions Checked | Software |
| --- | --- | --- | --- |
| Normality Testing | Shapiro-Wilk test | Data distribution | Python/SciPy |
| Variance Homogeneity | Levene's test | Equal variances | Python/SciPy |
| Group Comparisons | Student's t-test | Normal distribution, equal variances | Python/SciPy |
| Alternative Comparison | Welch's t-test | Normal distribution, unequal variances | Python/SciPy |
| Correlation Analysis | Pearson correlation | Linear relationships | Python/SciPy |
| Significance Level | α = 0.05 | - | - |
